# Supplementary material
Source: PubMed Central journal article supplement (PMC6603255)
Supplement: 10815_2019_1474_MOESM1_ESM.pdf [file 10815_2019_1474_MOESM1_ESM.pdf]

# PCSK9 and Lp(a) levels of children born after assisted reproduction technologies

## Journal of Assisted Reproduction and Genetics

Charalambos Vlachopoulos, MD, Ioanna Kosteria\*, MD, Sophia Sakka\*, MD, Alexandra Gkourogianni\*, MD, Dimitrios Terentes-Printzios, MD, Iosif Koutagiari, MD, Ioannis Skoumas, MD, Antigoni Miliou, PhD, Ioannis Papassotiriou, Vasiliki Gardikioti, MD, Dimitrios Loutradis, MD, George Chrousos, MD, Christina Kanaka-Gantenbein, MD, Dimitrios Tousoulis, MD

\* These authors have contributed equally to the MS

**Corresponding author:** Charalambos Vlachopoulos, 1st Cardiology Department, Athens Medical School, National and Kapodistrian University of Athens, Hippokraton Hospital, Profiti Elia 24, Athens 14575, Greece. Tel: +30 697 227 2727; fax: +30 210 747 3374; e-mail: [cvlachop@otenet.gr](mailto:cvlachop@otenet.gr)

### **Supplemental Methods**

One hundred six Caucasian children from the IVF Section of the First Department of Obstetrics and Gynecology of the University of Athens, as well as sixty-eight Caucasian subjects were randomly selected among healthy children routinely examined in “Aghia Sophia” Children’s Hospital, with the only restriction of not having been conceived after IVF (controls). Children underwent a baseline assessment upon entry into the study.<sup>4</sup> Enrollment took place between 2007 and 2010. Similarly, forty-two ICSI-conceived prepubertal Caucasian children were recruited randomly from the IVF Section of the First Department of Obstetrics-Gynecology of the University of Athens and forty-two naturally conceived healthy prepubertal Caucasian children (controls) were enrolled between 2005 and 2006 and underwent a baseline assessment

upon entry into the study.<sup>5</sup> Children were included only after informed written consent was obtained from their parents or guardians. Following an overnight fast, blood work was collected at 8 AM and analyzed. Plasma samples collected at baseline were stored in a -80°C freezer within 2 hours after blood collection and used in 2017 for the determination of plasma PCSK9 concentrations.
